# Supplementary material
Source: PubMed Central journal article supplement (PMC8020262)
Supplement: bloodBLD2020005477-suppl1.pdf [file bloodBLD2020005477-suppl1.pdf]

Supplemental Table 1. Signs and symptoms present at time of transplantation

| Pt Number | Onset (mo) | Age of Transplant (mo) | RIC | Global Delay | Abnormal gait | Abnormal muscle tone | Reflux | Constipation | Feeding Difficulty | Tracking Difficulty | Abnormal Pupillary Response | Staring Spells | Clonus | Abnormal DTR | Seizure |
|-----------|------------|------------------------|-----|--------------|---------------|----------------------|--------|--------------|--------------------|---------------------|-----------------------------|----------------|--------|--------------|---------|
| 1         | N/A        | 13                     | 0   | 0            | 0             | 0                    | 0      | 0            | 0                  | 0                   | 0                           | 0              | 0      | 0            | 0       |
| 2         | N/A        | 40                     | 0   | 0            | 0             | 0                    | 0      | 0            | 0                  | 0                   | 0                           | 0              | 0      | 0            | 0       |
| 3         | N/A        | 1                      | 0   | 0            | 0             | 0                    | 0      | 0            | 0                  | 0                   | 0                           | 0              | 0      | 0            | 0       |
| 4         | N/A        | 3                      | 0   | 0            | 0             | 0                    | 0      | 0            | 0                  | 0                   | 0                           | 0              | 0      | 0            | 0       |
| 5         | N/A        | 4                      | 0   | 0            | 0             | 0                    | 0      | 0            | 0                  | 0                   | 0                           | 0              | 0      | 0            | 0       |
| 6         | 10         | 14                     | 0   | 1            | 0             | 1                    | 0      | 0            | 0                  | 0                   | 0                           | 0              | 0      | 1            | 0       |
| 7         | 15         | 34                     | 0   | 0            | 1             | 1                    | 0      | 0            | 0                  | 0                   | 1                           | 0              | 0      | 0            | 0       |
| 8         | 10.5       | 15                     | 0   | 1            | 0             | 1                    | 0      | 0            | 1                  | 0                   | 1                           | 0              | 0      | 1            | 0       |
| 9         | 12         | 23                     | 0   | 1            | 0             | 1                    | 0      | 0            | 0                  | 0                   | 0                           | 0              | 0      | 0            | 1       |
| 10        | 8          | 11                     | 0   | 1            | 0             | 1                    | 0      | 0            | 1                  | 0                   | 0                           | 0              | 1      | 1            | 0       |
| 11        | 12         | 21                     | 0   | 0            | 0             | 1                    | 1      | 0            | 1                  | 0                   | 0                           | 0              | 0      | 0            | 1       |
| 12        | 10         | 18                     | 0   | 1            | 0             | 1                    | 0      | 1            | 0                  | 0                   | 0                           | 0              | 0      | 1            | 0       |
| 13        | 31         | 38                     | 0   | 0            | 1             | 1                    | 0      | 0            | 0                  | 0                   | 0                           | 1              | 1      | 1            | 0       |
| 14        | 28         | 32                     | 1   | 0            | 1             | 1                    | 0      | 1            | 0                  | 0                   | 0                           | 0              | 1      | 1            | 0       |
| 15        | 17         | 19                     | 1   | 1            | 0             | 1                    | 1      | 1            | 0                  | 0                   | 0                           | 0              | 0      | 0            | 0       |
| 16        | 7.5        | 12                     | 0   | 0            | 0             | 1                    | 1      | 1            | 1                  | 0                   | 0                           | 1              | 0      | 1            | 0       |
| 17        | 24         | 28                     | 1   | 0            | 1             | 0                    | 0      | 1            | 0                  | 0                   | 0                           | 1              | 0      | 1            | 0       |
| 18        | 6          | 8                      | 1   | 0            | 0             | 1                    | 1      | 1            | 1                  | 1                   | 0                           | 0              | 1      | 1            | 0       |
| 19        | 35         | 44                     | 1   | 1            | 1             | 1                    | 0      | 1            | 0                  | 0                   | 0                           | 1              | 0      | 0            | 0       |

Supplemental Table 1 displays selected signs and symptoms that were present in patients at the time of transplantation. While data exists on a more diverse and inclusive set of signs and symptoms, the ones selected here represent the most frequent and pertinent found in this cohort of patients. A “1” indicates that the sign/symptom was present; a “0” indicates that the sign/symptom was not present. Patients with N/A were asymptomatic at the time of transplantation.
